# Supplementary material for: Long-lasting subjective effects of LSD in normal subjects
Source: Psychopharmacology (Berl). 2017 Sep 16;235(2):535–45. doi: 10.1007/s00213-017-4733-3 (PMC5813062; doi:10.1007/s00213-017-4733-3)
Supplement: Supplementary file 3 — (PDF 17 kb) [file 213_2017_4733_MOESM3_ESM.pdf]

# Death Transcendence Scale

**Bitte füllen Sie diesen Fragebogen hinsichtlich aller Erfahrungen, welche Sie bisher in Ihrem Leben gemacht haben, aus.**

Bitte beantworten Sie die Aussagen, indem Sie die folgende Beurteilungsskala benutzen. Umkreisen Sie die für Sie zutreffenden Antworten. Versuchen Sie, falls möglich, die Antwort "ich weiss nicht" zu vermeiden.

|     |                           |
|-----|---------------------------|
| +3: | stimme stark zu           |
| +2: | stimme zu                 |
| +1: | stimme eher zu            |
| 0:  | Ich weiss nicht           |
| -1: | stimme eher nicht zu      |
| -2: | stimme nicht zu           |
| -3: | stimme überhaupt nicht zu |

Deutsche Übersetzung der Death Transcendence Scale (VandeCreek) durch Schmid und Liechti

|                                                                                                                             | Stimme<br>stark zu | stimme zu | stimme<br>eher zu | ich weiss<br>nicht | stimme<br>eher<br>nicht zu | stimme<br>nicht zu | stimme<br>überhaupt<br>nicht zu |
|-----------------------------------------------------------------------------------------------------------------------------|--------------------|-----------|-------------------|--------------------|----------------------------|--------------------|---------------------------------|
| 1. Wenn ich nie etwas Bedeutsames mache,<br>wird mein Leben verschwendet sein.                                              | +3                 | +2        | +1                | 0                  | -1                         | -2                 | -3                              |
| 2. Ohne Kinder ist das Leben unvollständig.                                                                                 | +3                 | +2        | +1                | 0                  | -1                         | -2                 | -3                              |
| 3. Ich hatte ein Erlebnis, in welchem ich fühlte,<br>dass alles in der Welt Teil eines gemeinsamen<br>Ganzen ist.           | +3                 | +2        | +1                | 0                  | -1                         | -2                 | -3                              |
| 4. Ich hatte nie ein Erlebnis, in welchem sich alle<br>Dinge zu einem Ganzen zu vereinen schienen.                          | +3                 | +2        | +1                | 0                  | -1                         | -2                 | -3                              |
| 5. Mein Tod beendet meine persönliche Existenz<br>nicht.                                                                    | +3                 | +2        | +1                | 0                  | -1                         | -2                 | -3                              |
| 6. Bäche, Bäume und Menschen sind alle<br>Eins in der Natur.                                                                | +3                 | +2        | +1                | 0                  | -1                         | -2                 | -3                              |
| 7. Es gibt eine Kraft oder Macht, welche sowohl<br>das Leben als auch den Tod kontrolliert und<br>ihnen Bedeutung verleiht. | +3                 | +2        | +1                | 0                  | -1                         | -2                 | -3                              |
| 8. Ich hatte nie ein Erlebnis, in welchem ich<br>mir der Einheit aller Dinge bewusst wurde.                                 | +3                 | +2        | +1                | 0                  | -1                         | -2                 | -3                              |

|                                                                                                                | Stimme<br>stark zu | stimme zu | stimme<br>eher zu | ich weiss<br>nicht | stimme<br>eher nicht<br>zu | stimme<br>nicht<br>zu | stimme<br>überhaupt<br>nicht zu |
|----------------------------------------------------------------------------------------------------------------|--------------------|-----------|-------------------|--------------------|----------------------------|-----------------------|---------------------------------|
| 9. Nur die Natur ist für ewig.                                                                                 | +3                 | +2        | +1                | 0                  | -1                         | -2                    | -3                              |
| 10. Wenn andere, die ich liebe, sich nach meinem Tod nicht mehr an mich erinnern, war mein Leben verschwendet. | +3                 | +2        | +1                | 0                  | -1                         | -2                    | -3                              |
| 11. Ich hatte ein Erlebnis, in welchem ich die Einheit von mir mit allen Dingen erkannte.                      | +3                 | +2        | +1                | 0                  | -1                         | -2                    | -3                              |
| 12. Tod ist nie nur ein Ende, sondern ein Teil eines Prozesses.                                                | +3                 | +2        | +1                | 0                  | -1                         | -2                    | -3                              |
| 13. Nach meinem Tod wird vieles von mir durch meine Kinder weiterleben.                                        | +3                 | +2        | +1                | 0                  | -1                         | -2                    | -3                              |
| 1. Ich mag sterben, aber die Flüsse und Berge bleiben.                                                         | +3                 | +2        | +1                | 0                  | -1                         | -2                    | -3                              |
| 15. Ich glaube an ein Leben nach dem Tod.                                                                      | +3                 | +2        | +1                | 0                  | -1                         | -2                    | -3                              |
| 16. Bedeutungslose Arbeit führt zu einem bedeutungslosen Leben.                                                | +3                 | +2        | +1                | 0                  | -1                         | -2                    | -3                              |
| 17. Ich hatte nie ein Erlebnis, in welchem ich mich mit allen Dingen verbunden und Eins fühlte.                | +3                 | +2        | +1                | 0                  | -1                         | -2                    | -3                              |
| 18. Kreativ sein heisst für immer leben.                                                                       | +3                 | +2        | +1                | 0                  | -1                         | -2                    | -3                              |
| 19. Der Tod ist so natürlich wie alles Andere in der Natur.                                                    | +3                 | +2        | +1                | 0                  | -1                         | -2                    | -3                              |
| 20. Mein Leben mag enden, aber was wichtig ist wird durch meine Familie weiterleben.                           | +3                 | +2        | +1                | 0                  | -1                         | -2                    | -3                              |
| 21. Ohne Kinder wäre vieles, was im Leben am wertvollsten ist verschwendet.                                    | +3                 | +2        | +1                | 0                  | -1                         | -2                    | -3                              |
| 22. Feste Beziehungen mit Familie und Freunden ist ein beständiger Wert.                                       | +3                 | +2        | +1                | 0                  | -1                         | -2                    | -3                              |
| 23. Beziehungen mit Familie und Freunden sind unter den beständigsten Werten.                                  | +3                 | +2        | +1                | 0                  | -1                         | -2                    | -3                              |

|                                                                                                      | Stimme<br>stark zu | stimme zu | stimme<br>eher zu | ich weiss<br>nicht | stimme<br>eher nicht<br>zu | stimme<br>nicht<br>zu | stimme<br>überhaupt<br>nicht zu |
|------------------------------------------------------------------------------------------------------|--------------------|-----------|-------------------|--------------------|----------------------------|-----------------------|---------------------------------|
| 24. Der Tod ist ein Übergang zu etwas noch Grösserem als dieses Leben.                               | +3                 | +2        | +1                | 0                  | -1                         | -2                    | -3                              |
| 25. Was auch immer kommt, wir sind alle Teil der Natur.                                              | +3                 | +2        | +1                | 0                  | -1                         | -2                    | -3                              |
| 26. Für mich ist es wichtig, im Leben etwas zu tun, wofür man sich nach meinem Tod an mich erinnert. | +3                 | +2        | +1                | 0                  | -1                         | -2                    | -3                              |
